# Supplementary material
Source: PubMed Central journal article supplement (PMC7423633)
Supplement: NIHMS1609707-supplement-Supplementary_Combined.pdf [file NIHMS1609707-supplement-Supplementary_Combined.pdf]

**GSTM1 Amplification**

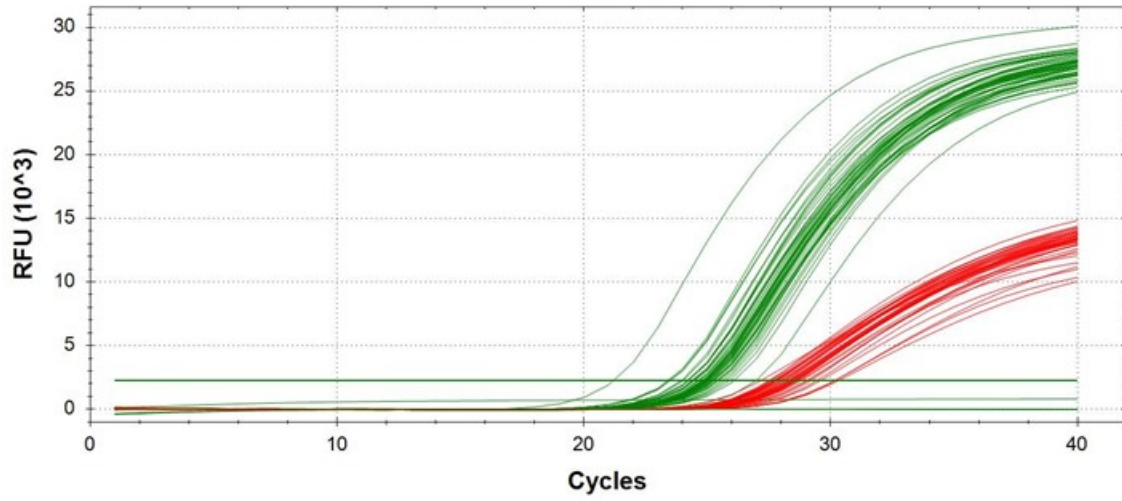

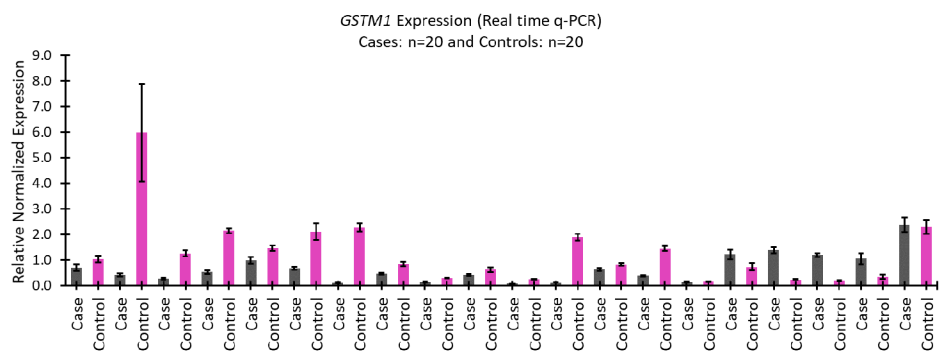

**Supporting Figure 1.** The chart shows the amplification profiles for *GSTM1* (FAM probe). Green curves show homozygous (2N) or heterozygous (1N) positive genotype and red curves show homozygous null genotype.

**Supporting Figure 2.** Relative gene expression of significantly deregulated *GSTM1* (Taqman custom design primers and probes spanning Exons 7-8) in anthracycline-induced cardiomyopathy normalized to  $\beta$ -actin gene (*ACTB*). Matched Cases (grey) and Controls (pink) were analyzed in triplicates by qPCR assay. Error bars indicate the standard deviation from the mean in each sample.

## SUPPORTING METHODS

***GSTM1 genotyping:*** The multiplex PCR assay does not distinguish heterozygous or homozygous wild type genotypes (2N and 1N) and therefore only the presence (at least 1 allele present, homozygote or heterozygote) or the absence (complete deletion of both alleles, null) was reported (see Supporting Fig. 1). Reagents were obtained from Thermo Fisher Scientific (Grand Island, NY). Thermal cycling was carried out in 96-well plates using the CFX96 Touch™ Real-Time PCR Detection System (BioRad). Genomic DNA (Cat. Nos. NA12236, NA17657 and NA18540) from Coriell biorepository were used as positive and negative control in PCR-based genotyping reactions.<sup>1</sup>

***Microarray:*** Each RNA sample was amplified using Illumina TotalPrep RNA Amplification kit (Thermo Fisher Scientific) with biotin-UTP (Enzo Life Sciences, Inc., Farmingdale, NY, USA) labeling. The TotalPrep Illumina RNA Amplification kit uses T7-oligo(dT) primer to generate single-stranded cDNA followed by a second-strand synthesis to generate double-stranded cDNA and purified through spin column, using T7 RNA polymerase to synthesize biotin-labeled cRNA, and re-purified. The cRNA was then quantified using the ND-1000 Spectrophotometer (Thermo Fisher Scientific). A total of 1.5 µg cRNA from each sample was hybridized on each array using standard Illumina protocols with streptavidin-Cy3 (Amersham Biosciences Corp., Piscataway, NJ, USA) for detection. Slides were scanned on Illumina HiScan scanner and analyzed using GenomeStudio (Illumina, Inc.). Raw files of Illumina HumanHT-12 v4.0 expression array were extracted and normalized (Quantile) in GenomeStudio Module. We analyzed all probes from Illumina HT-12v4 expression array for *GSTM1* gene, with one probe (ILMN\_2391861) showing signal intensities above housekeeping genes.

***RT-qPCR:*** cDNA synthesis was performed using SuperScript™ IV VILLO™ Master Mix with ezDNase™ enzyme following the manufacturer's instructions (Thermo Fisher Scientific) using Taqman assays and TaqMan® Fast Advanced Master Mix on a CFX96 Real-Time PCR system (Bio-Rad) in triplicate. The normalized expression analysis ( $\Delta\Delta CT$ ) was performed using the CFX Maestro software and the relative normalized

expression levels were plotted to compare cases and controls.

**RNA sequencing in cardiomyocytes:** Library preparation was done using a TruSeq RNA v2 kit (Illumina) and sequencing with NextSeq 500 instrument (Illumina) by Northwestern's NuSeq core facility, generating ~40 million single-end 75 bp reads for each sample. Reads were mapped to the GRCh38 reference human genome using Subread software. <sup>2</sup>

## References

1. Pratt VM, Everts RE, Aggarwal P, et al. Characterization of 137 Genomic DNA Reference Materials for 28 Pharmacogenetic Genes: A GeT-RM Collaborative Project. *J Mol Diagn.* 2016;18: 109-123.
2. Liao Y, Smyth GK, Shi W. The Subread aligner: fast, accurate and scalable read mapping by seed-and-vote. *Nucleic Acids Res.* 2013;41: e108.

**Supporting Table 1. Participating Children’s Oncology Group Institutions**

A.B. Chandler Medical Ctr - University of Kentucky  
A.I. duPont Hospital for Children  
Advocate Hope Children's Hospital  
All Children's Hospital  
Allan Blair Cancer Centre  
Baptist Children's Hospital  
British Columbia's Children's Hospital  
Brooklyn Hospital Center  
C.S. Mott Children's Hospital  
Cancer Research Center of Hawaii  
CancerCare Manitoba  
Cedars-Sinai Medical Center  
Children's Healthcare of Atlanta, Emory University  
Childrens Hospital & Clinics Minneapolis & St Paul  
Childrens Hospital London Health Sciences  
Childrens Hospital Los Angeles  
Childrens Hospital Medical Center-Akron, Ohio  
Childrens Hospital Oakland  
Children's Hospital of Eastern Ontario  
Children's Hospital of Michigan  
Childrens Hospital of Philadelphia  
Children's Hospital of the Greenville Hospital System  
Childrens Hospital-King's Daughters  
Children's Medical Center Dayton  
Children's Memorial Medical Center at Chicago  
Children's National Medical Center - D.C.  
Children's of New Orleans/LSUMC CCOP  
Cincinnati Children's Hospital Medical Center  
City of Hope National Medical Center  
Connecticut Children's Medical Center  
Cook Children's Medical Center  
Dana-Farber Cancer Institute and Children's Hosp  
Driscoll Children's Hospital  
East Tennessee Childrens Hospital  
East Tennessee State University  
Eastern Maine Medical Center  
Emanuel Hospital-Health Center  
Hackensack University Medical Center  
Helen DeVos Children's Hospital  
Hospital Sainte-Justine  
Hospital for Sick Children  
Hurley Medical Center  
Indiana University - Riley Childrens Hospital  
Inova Fairfax Hospital  
IWK Health Centre  
Kaiser Permanente Medical Group, Inc., Northern CA

Kalamazoo Center for Medical Studies  
Kingston General Hosp/Kingston Regional Cancer  
Kosair Childrens Hospital  
M.D. Anderson Cancer Center  
Maimonides Medical Center  
Mayo Clinic and Foundation  
McGill University Health Center - Montreal Children's Hosp  
McMaster University  
Medical College of Georgia Childrens Medical Ctr  
Memorial Sloan Kettering Cancer Center  
Methodist Children's Hospital of South Texas  
Miami Children's Hospital  
Michigan State University  
Midwest Children's Cancer Center  
Nationwide Children's Hospital  
Nemours Children's Clinic-Jacksonville  
Nevada Cancer Research Foundation - CCOP  
New York Medical College  
Newark Beth Israel Medical Center  
Primary Childrens Medical Center  
Princess Margaret Hospital for Children  
Rady Children's Hosp San Diego  
Rainbow Babies and Childrens Hospital  
Royal Children's Hospital, Brisbane  
Royal Children's Hospital, University of Melbourne  
Sacred Heart Children's Hospital  
Sacred Heart Hospital  
Saint Barnabas Medical Center  
Saint Peter's University Hospital  
Saskatoon Cancer Center  
Scott & White Memorial Hospital  
Seattle Children's  
South Carolina Cancer Center  
St John Hospital and Medical Center  
St. Joseph's Hospital and Medical Center  
St. Jude Children's Research Hospital Memphis  
St. Vincent Children's Hospital - Indiana  
St. Vincent Hospital - Wisconsin  
Stanford University Medical Center  
State University of New York at Stony Brook  
Stollery Children's Hospital  
SUNY Upstate Medical University  
Swiss Pediatric Oncology Group Geneva  
Tampa Children's Hospital  
Texas Children's Cancer Center at Baylor College of Medicine  
Texas Tech UHSC - Amarillo  
The Children's Hospital - Denver, CO

The Children's Hospital of Southwest Florida Lee Memorial Health System  
The Childrens Mercy Hospital  
The University of Chicago Comer Children's Hosp  
Tulane University Medical Center  
UCLA David Geffen School of Medicine  
University of Alabama  
University of Florida  
University of Iowa Hospitals & Clinics  
University of Kansas Medical Center  
University of Minnesota Cancer Center  
University of Mississippi Medical Center Children's Hospital  
University of Missouri - Columbia  
University of New Mexico School of Medicine  
University of North Carolina at Chapel Hill  
University of Oklahoma Health Sciences Center  
University of Pittsburgh  
University of Texas Health Science Center at San Antonio  
University of Vermont College of Medicine  
University of Wisconsin - Childrens Hosp Madison  
UT Southwestern Medical Center  
Vanderbilt Children's Hospital  
Virginia Commonwealth Univ Health System-MCV  
Wake Forest University School of Medicine  
Washington University Medical Center  
West Virginia University HSC - Charleston  
Winthrop University Hospital  
Women's and Children's Hospital, Adelaide  
Yale University School of Medicine



**Supporting Table 2.** Echocardiographic evidence of case vs control determination

| <b>Clinical Characteristics</b> | <b>N</b> | <b>Mean EF (%)</b> | <b>Mean SF (%)</b> |
|---------------------------------|----------|--------------------|--------------------|
| <b>Cases</b>                    | 75       | 39.42              | 22.23              |
| Cases with EF and SF            | 37       | 42.25              | 21.87              |
| Cases with only EF              | 13       | 29.15              | -                  |
| Cases with only SF              | 15       | -                  | 23.33              |
| <b>Controls</b>                 | 92       | 65.97              | 36.72              |
| Controls with EF and SF         | 26       | 67.38              | 36.27              |
| Controls with only EF           | 13       | 63.15              | -                  |
| Controls with only SF           | 17       | -                  | 37.42              |
| MD note indicating no symptom   | 36       | -                  | -                  |

**Supporting Table 3.** Univariable analysis of *GSTM1* gene variants with Anthracycline- induced cardiomyopathy

| <b>Variables</b>           | <b>Cases<br/>(N=75)</b> | <b>Controls<br/>(N=92)</b> | <b>p-value*</b> |
|----------------------------|-------------------------|----------------------------|-----------------|
| <b><i>GSTM1</i> (N, %)</b> |                         |                            |                 |
| null                       | 45 (60.00)              | 35 (38.04)                 | <b>0.005</b>    |
| positive                   | 30 (40.00)              | 57 (61.96)                 |                 |

\* Estimated using chi-square for categorical variables

| <b>Supporting Table 4. Risk Factors associated with Anthracycline-related Cardiomyopathy</b> |                      |                 |
|----------------------------------------------------------------------------------------------|----------------------|-----------------|
| <b>Risk Factor</b>                                                                           | <b>OR (95% CI)</b>   | <b>p-value*</b> |
| <b>Age at primary cancer diagnosis (years)</b>                                               |                      |                 |
| Per year increase in age                                                                     | 0.95 (0.88-1.02)     | 0.1             |
| <b>Anthracycline Dose (mg/m<sup>2</sup>) ‡</b>                                               |                      |                 |
| Per mg increase in dose                                                                      | 1.0 (1-1.01)         | <b>0.04</b>     |
| <b>Chest Radiation</b>                                                                       |                      |                 |
| No                                                                                           | 1.00                 |                 |
| Yes                                                                                          | 1.5 (0.6-3.6)        | 0.4             |
| <b>Sex</b>                                                                                   |                      |                 |
| Male                                                                                         | 1.00                 |                 |
| Female                                                                                       | 1.6 (0.8-3.3)        | 0.2             |
| <b>Genotype</b>                                                                              |                      |                 |
| <i>GSTM1</i> positive                                                                        | 1.00                 |                 |
| <i>GSTM1</i> null                                                                            | <b>2.5 (1.2-5.2)</b> | <b>0.01</b>     |

\* Estimated from conditional logistic regression model that included age at cancer diagnosis, sex, chest radiation and anthracycline dose (continuous)

‡ Doses not available for one case and one control

Abbreviations: CI, confidence interval; OR, odds ratio

**Supporting Table 5. Risk Factors associated with Anthracycline-related Cardiomyopathy stratified by cumulative anthracycline exposure**

| Anthracycline Dose (mg/m <sup>2</sup> ) <sup>‡</sup> | <250<br>(N=65)   |          | ≥250<br>(N=100)       |             |
|------------------------------------------------------|------------------|----------|-----------------------|-------------|
|                                                      | OR (95% CI)      | p-value* | OR (95% CI)           | p-value*    |
| <b>Age at primary cancer diagnosis (years)</b>       |                  |          |                       |             |
| Per year increase in age                             | 0.96 (0.88-1.05) | 0.4      | 0.95 (0.88-1.02)      | 0.2         |
| <b>Chest Radiation</b>                               |                  |          |                       |             |
| No                                                   | 1.00             |          | 1.00                  |             |
| Yes                                                  | 2.6 (0.7-10.25)  | 0.2      | 1.02 (0.4-2.43)       | 0.9         |
| <b>Sex</b>                                           |                  |          |                       |             |
| Male                                                 | 1.00             |          | 1.00                  |             |
| Female                                               | 1.8 (0.6-5.4)    | 0.3      | 1.9 (0.8-4.4)         | 0.1         |
| <b>Genotype</b>                                      |                  |          |                       |             |
| <i>GSTM1</i> positive                                | 1.00             |          | 1.00                  |             |
| <i>GSTM1</i> null                                    | 2.3 (0.7-6.7)    | 0.1      | <b>2.6 (1.15-6.1)</b> | <b>0.02</b> |

\* Estimated from logistic regression model that included age at cancer diagnosis, sex and chest radiation

<sup>‡</sup> Doses not available for one case and one control

Abbreviations: CI, confidence interval; OR, odds ratio
